# Supplementary material
Source: publisher figshare collection journal article supplement (https://acs.figshare.com/ndownloader/files/22030491)
Supplement: Supplementary file 1 [file 22030491]

## ***Supporting Information***

### **Enabling sensitive phenotypic profiling of cancer-derived small extracellular vesicles using surface-enhanced Raman spectroscopy nanotags**

Wei Zhang, <sup>†</sup> Lianmei Jiang, <sup>†</sup> Russell J. Diefenbach, <sup>‡</sup> Douglas H. Campbell, <sup>§</sup> Bradley Walsh, <sup>§</sup> Nicolle H. Packer, <sup>†</sup> and Yuling Wang <sup>\*,†</sup>

<sup>†</sup> ARC Excellence Centre for Nanoscale BioPhotonics (CNBP), Department of Molecular Sciences, Macquarie University, Sydney, NSW 2109, Australia

<sup>‡</sup> Department of Biomedical Sciences, Macquarie University, Sydney, NSW 2109, Australia

<sup>§</sup> Minomic International Ltd, Macquarie Park NSW 2113, Australia

\*Corresponding author.

Email: [yuling.wang@mq.edu.au](mailto:yuling.wang@mq.edu.au)

Tel: +61-2-98506914

## Table of contents

|                   |                                                                                                                                  |
|-------------------|----------------------------------------------------------------------------------------------------------------------------------|
| <b>Figure S1</b>  | Raman intensity of DTNB on AuNPs of different sizes.                                                                             |
| <b>Figure S2</b>  | TEM image of AuNPs-DTNB-MIL-38 antibody (SERS nanotag).                                                                          |
| <b>Figure S3</b>  | UV absorption spectra of AuNPs, AuNPs-DTNB and AuNPs-DTNB-MIL-38 antibody (SERS nanotag).                                        |
| <b>Figure S4</b>  | Raman spectra of AuNPs and AuNPs-DTNB.                                                                                           |
| <b>Figure S5</b>  | Specificity study of individual SERS nanotag for EV phenotypic profiling by using SERS assay.                                    |
| <b>Figure S6</b>  | TEM image of the sandwich complex formed on magnetic beads, with conditioned EV concentration of $1.2 \times 10^8$ particles/mL. |
| <b>Figure S7</b>  | Correlation curve of EV concentration (Log (particles/mL)) and Raman intensity.                                                  |
| <b>Figure S8</b>  | SERS spectra of the immunoassay with small EVs for 20 measurements.                                                              |
| <b>Figure S9</b>  | Size distribution and concentration of conditioned C3 EVs measured by qNano.                                                     |
| <b>Figure S10</b> | Size distribution and concentration of conditioned SW480 EVs measured by qNano.                                                  |

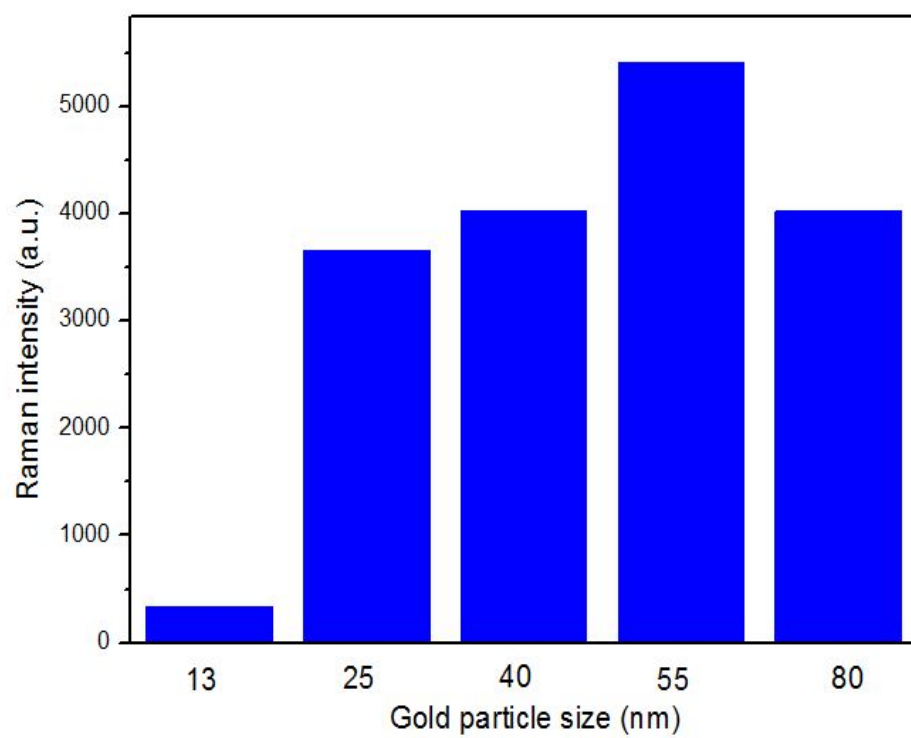

**Figure S1.** Raman intensity of DTNB on AuNPs at different sizes.

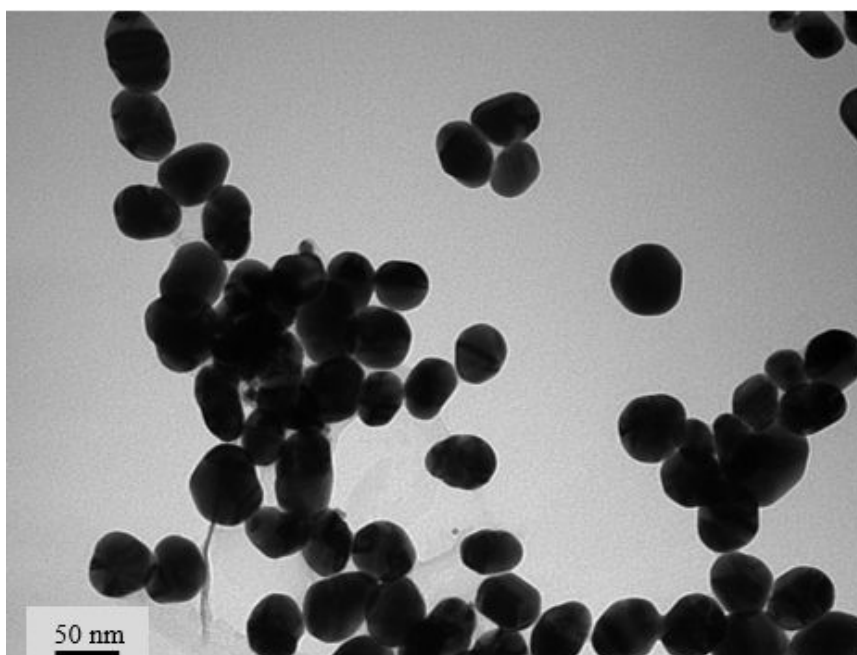

**Figure S2.** TEM image of AuNPs-DTNB-MIL-38 antibody (SERS nanotags).

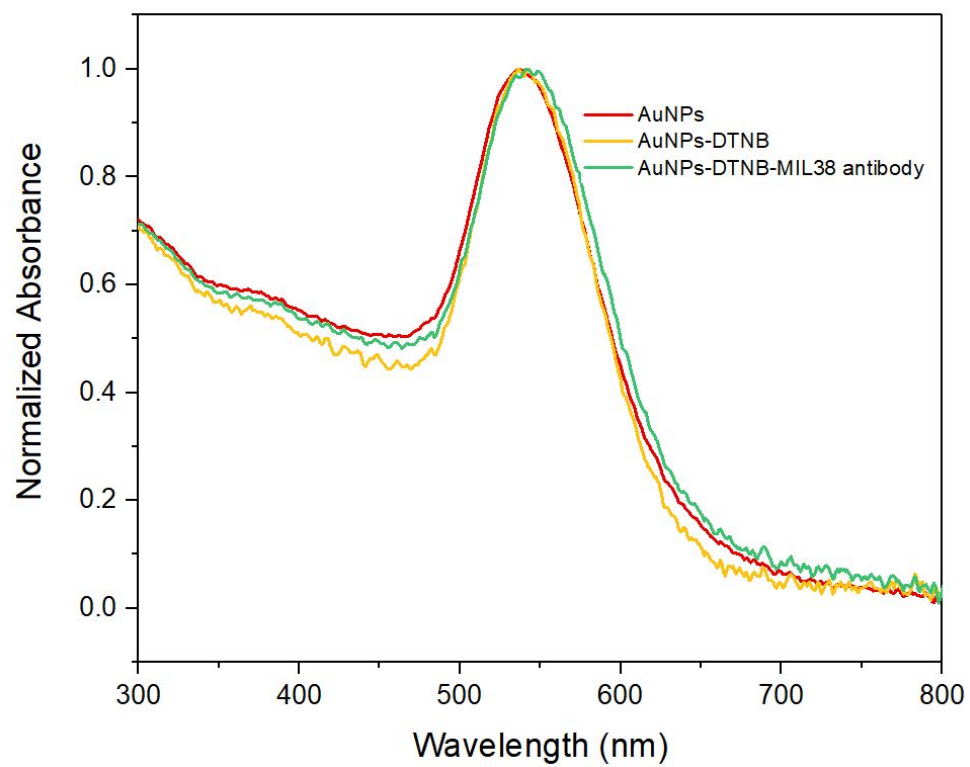

**Figure S3.** UV-vis absorption spectra of AuNPs, AuNPs-DTNB and AuNPs-DTNB-MIL-38 antibody (SERS nanotags).

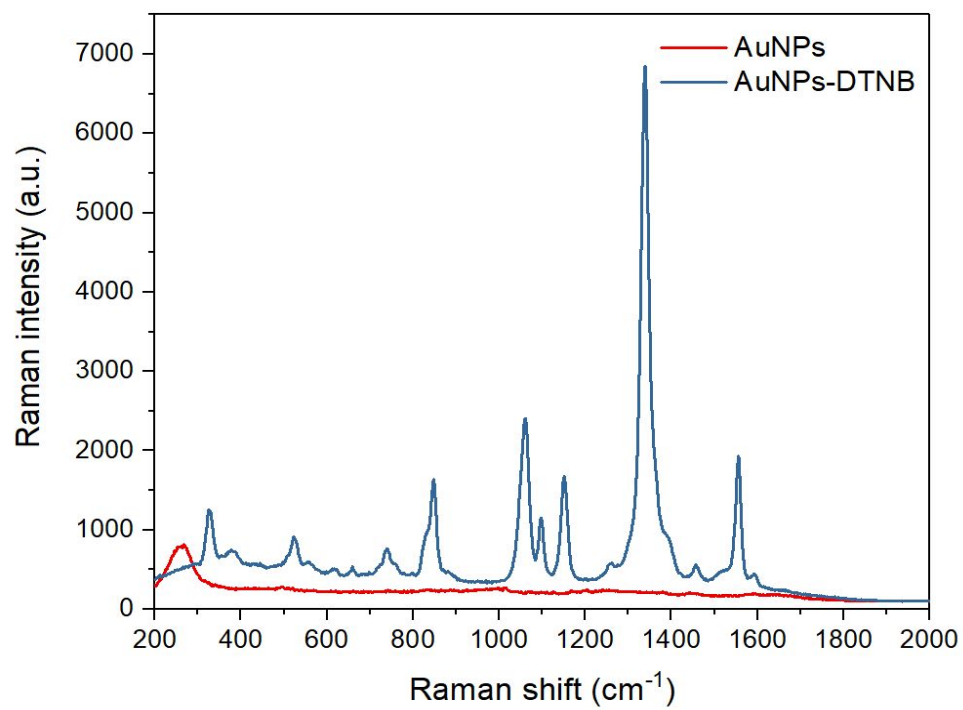

**Figure S4.** Raman spectra of AuNPs and AuNPs-DTNB.

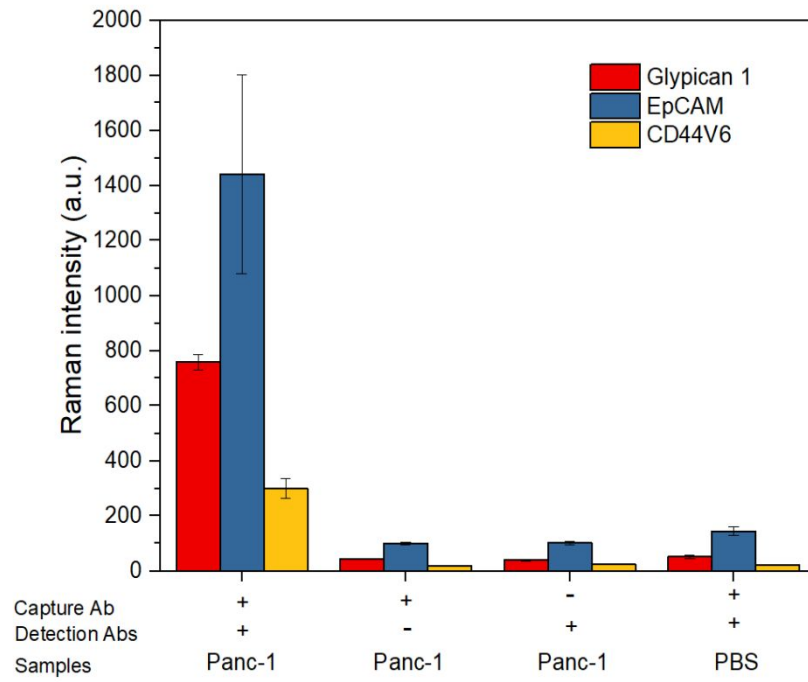

**Figure S5.** Specificity study of individual SERS nanotag for EV phenotypic profiling by using SERS assay (n=3).

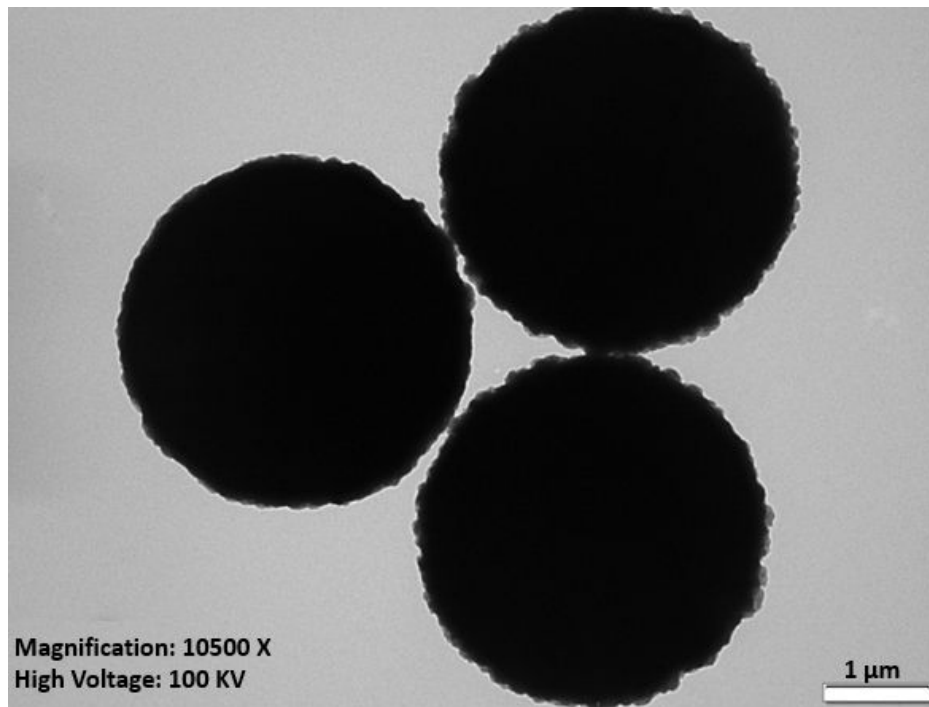

**Figure S6.** TEM image of the sandwich complex formed on magnetic beads, with conditioned EV concentration of  $1.2 \times 10^8$  particles/mL.



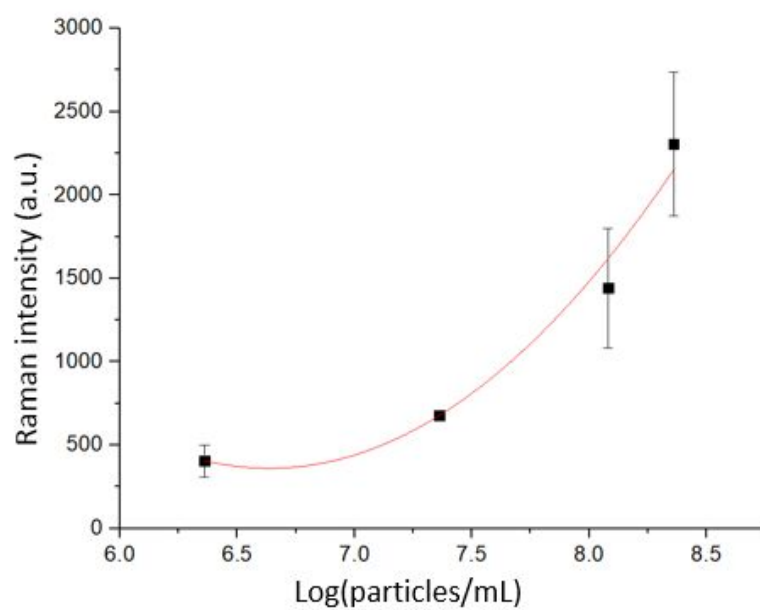

**Figure S7.** Correlation curve of EV concentration (Log (particles/mL)) and Raman intensity.

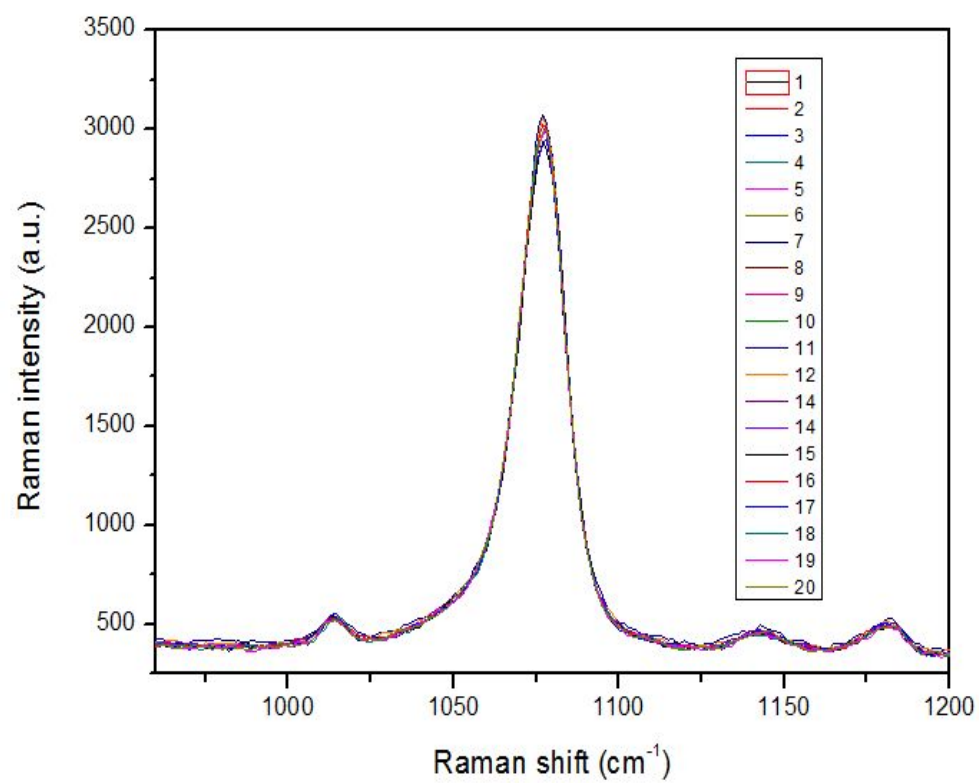

**Figure S8.** SERS spectra of the immunoassay with small EVs for 20 measurements.

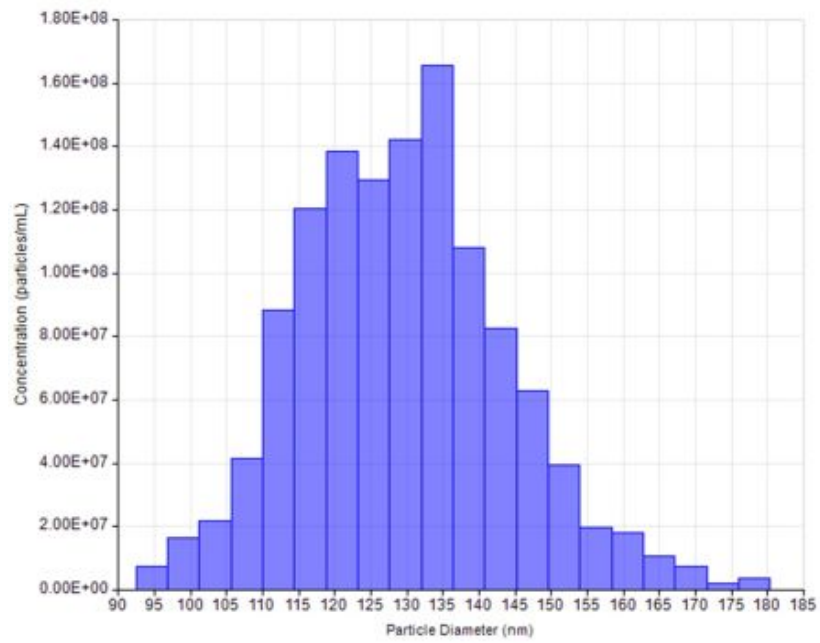

**Figure S9.** Size distribution and concentration of conditioned C3 EVs ( $1.2 \times 10^9$  particles/mL), measured by qNano.

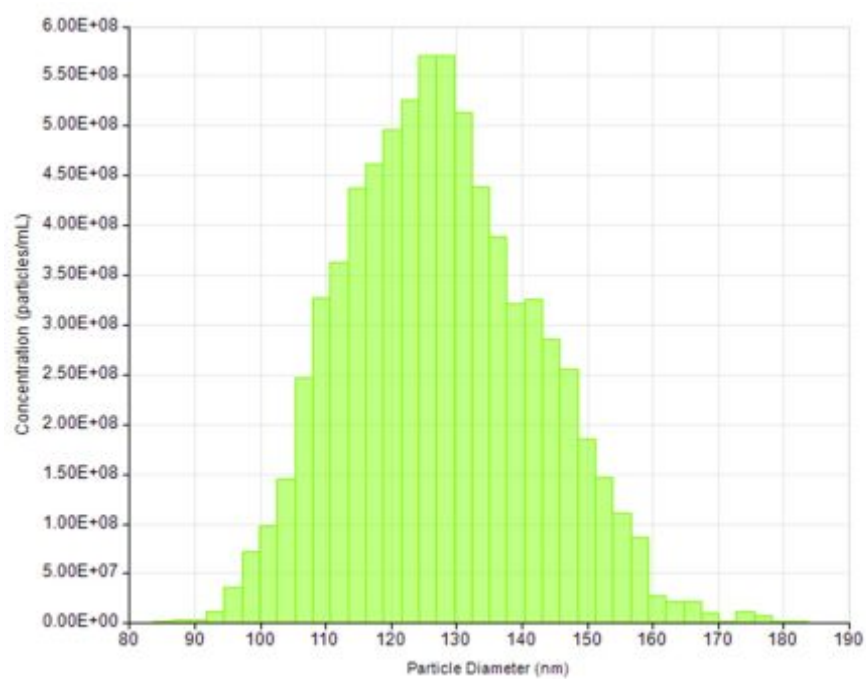

**Figure S10.** Size distribution and concentration of conditioned SW480 EVs ( $7.5 \times 10^9$  particles/mL), measured by qNano.
